# Supplementary material for: Surface termination dependent carbon dioxide reduction reaction on Ti3C2 MXene
Source: Royal Society of Chemistry journal article supplement (doi:10.1039/d4ta00320a), 2024-01-01

## **Surface Termination Dependent Carbon Dioxide Reduction Reaction on $\text{Ti}_3\text{C}_2$ MXene**

Ling Meng,<sup>a,b</sup> Li-Kai Yan,<sup>\*,b</sup> Francesc Viñes,<sup>\*,a</sup> Francesc Illas<sup>a</sup>

<sup>a</sup> *Departament de Ciència de Materials i Química Física & Institut de Química Teòrica i Computacional (IQTUB), Universitat de Barcelona, c/ Martí i Franquès 1-11, 08028, Barcelona, Spain*

<sup>b</sup> *Institute of Functional Material Chemistry, Key Laboratory of Polyoxometalate Science of Ministry of Education, Faculty of Chemistry, Northeast Normal University, Changchun 130024, P. R. China.*

\* Corresponding authors: Francesc Viñes ([francesc.vines@ub.edu](mailto:francesc.vines@ub.edu)), Li-Kai Yan ([yanlk924@nenu.edu.cn](mailto:yanlk924@nenu.edu.cn))

**Fig. S1** Top view of the  $\text{Ti}_3\text{C}_2$  (0001) surface model, where brown spheres denote C atoms, and three different Ti layers are shown with different shades of blue, being the topmost one the darkest. High-symmetry sites are tagged, including top (T) and bridge (B) sites, and three-fold hollow carbon ( $\text{H}_\text{C}$ ) and hollow metal ( $\text{H}_\text{M}$ ) sites.

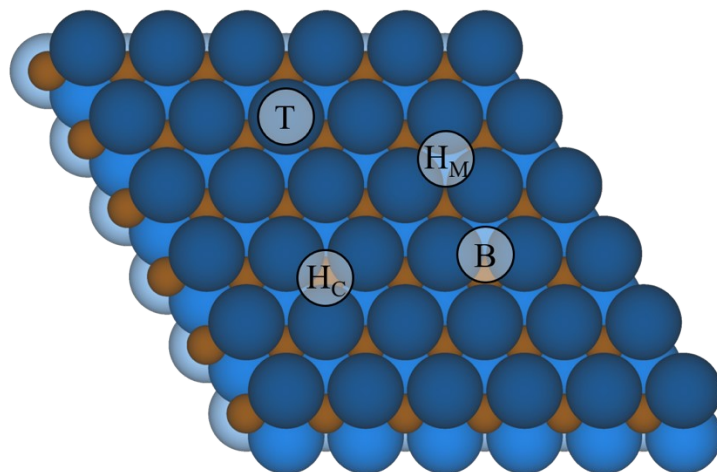

**Fig. S2** Predicted Pourbaix diagrams for  $\text{Ti}_3\text{C}_2$  MXene (0001) surface regarding all single, binary, and ternary surface compositions including  $-\text{O}$ ,  $-\text{OH}$ ,  $-\text{H}$ , and  $-\text{F}$  terminations, as well as free sites. Left image corresponds to situations without any  $-\text{F}$  termination, while right image corresponds to situations when regarding  $-\text{F}$  termination. The black, dashed line indicates the HER equilibrium potential with respect RHE reference.

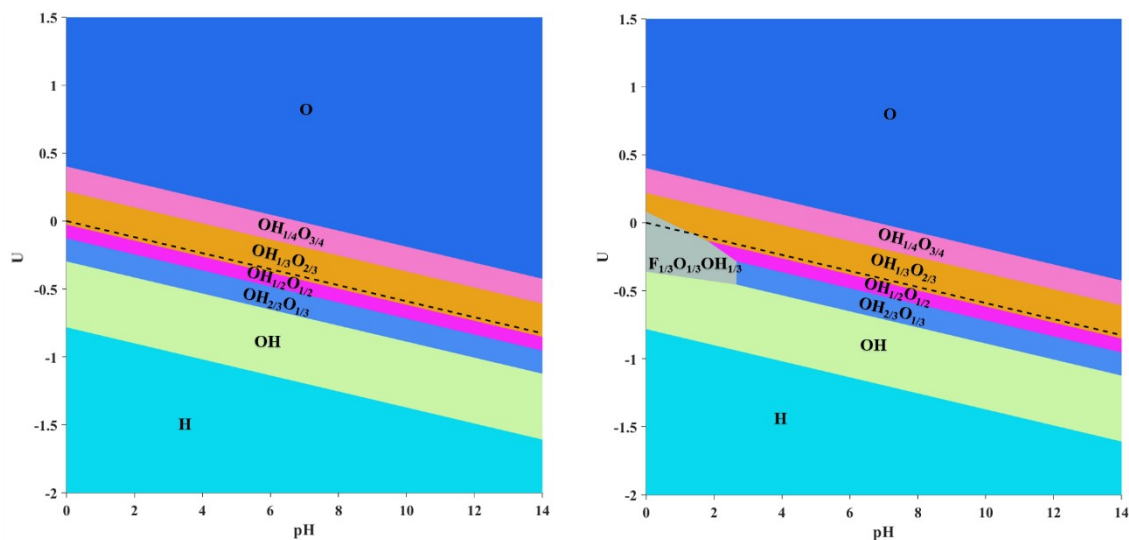

**Fig. S3** Total and projected density of states (PDOS) of the pristine  $\text{Ti}_3\text{C}_2$  (0001) surface model, as well as of the fully  $-\text{OH}$  terminated model, and of the rest of binary and ternary models explored in the present work, derived from Pourbaix diagrams shown in Fig. 1 of the main text. Energy levels are referred to the Fermi energy,  $E_F$ , set to zero.

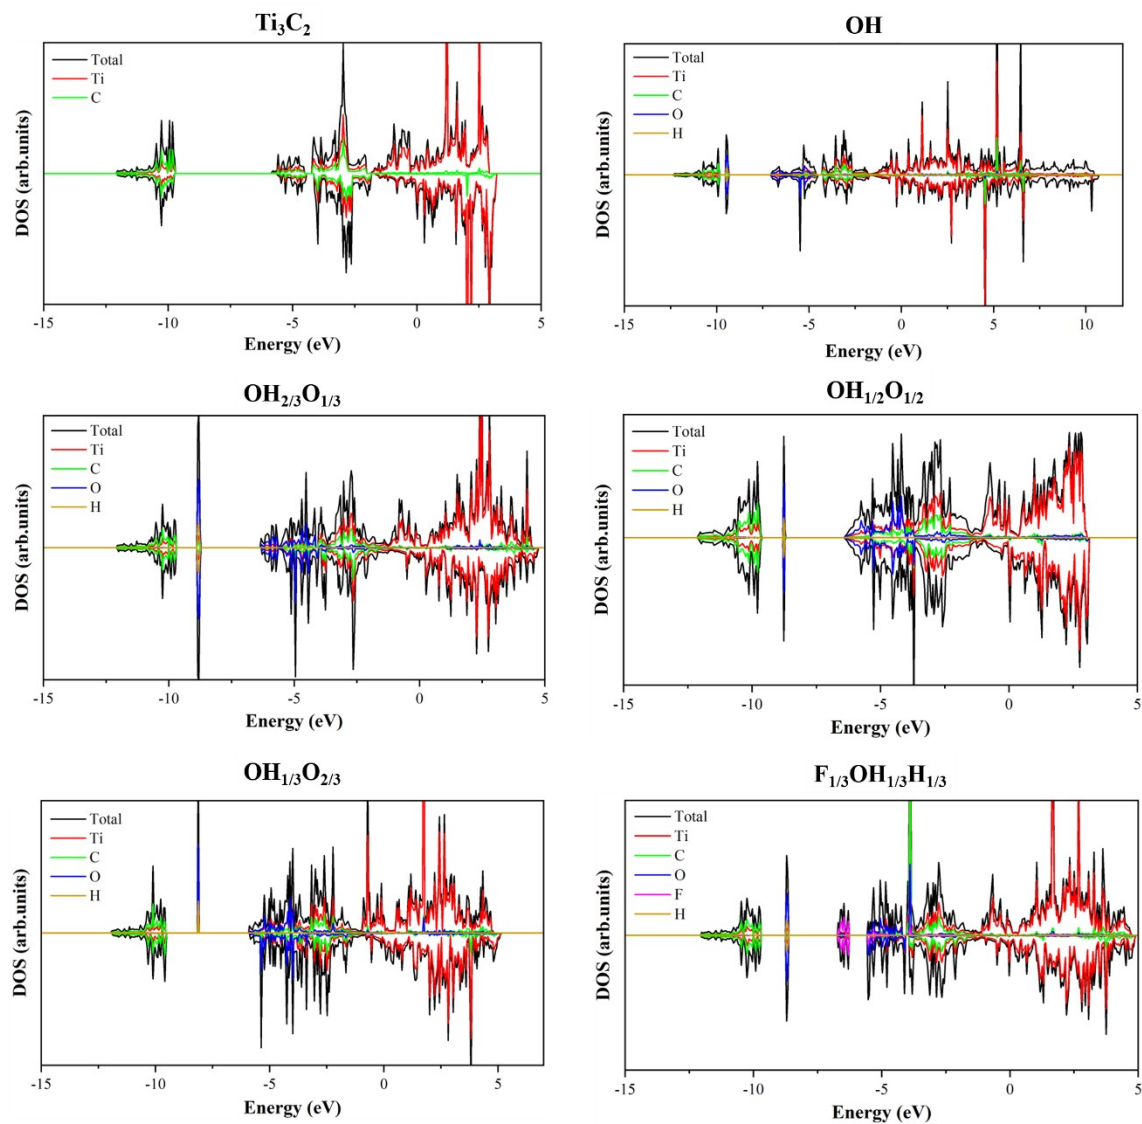

**Fig. S4** Details regarding the bonding modes of CO<sub>2</sub> adsorption on the Ti<sub>3</sub>C<sub>2</sub>(0001) surface with F<sub>1/3</sub>OH<sub>1/3</sub>O<sub>1/3</sub> termination, encompassing (a) the exploration of various hexagonal centre configurations to elucidate distinct CO<sub>2</sub> adsorption environments, and (b) the investigation of different orientations for CO<sub>2</sub> adsorption.

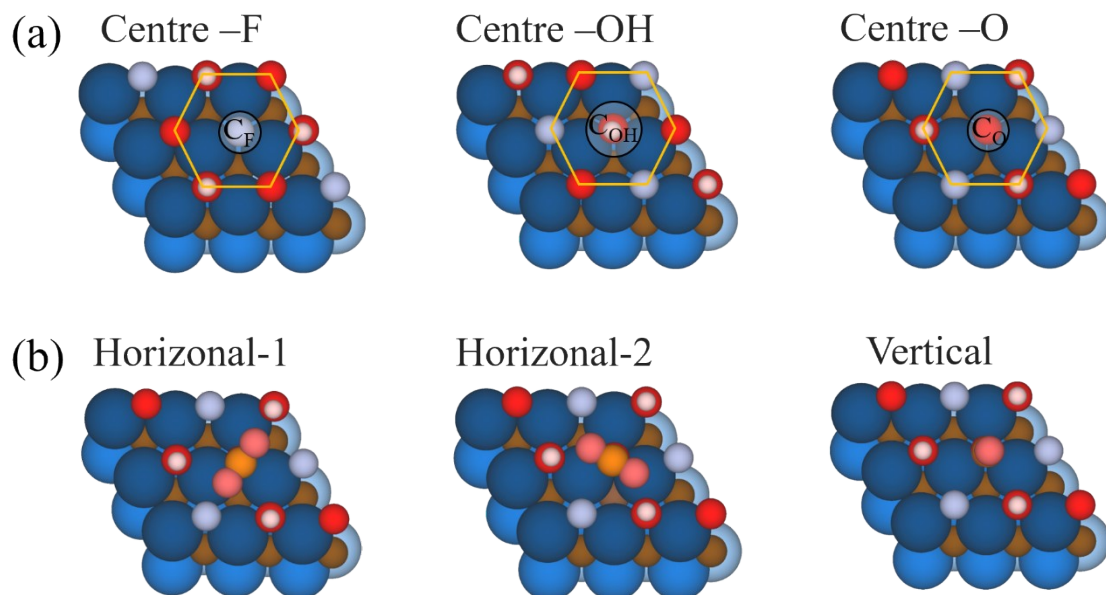

**Fig. S5** Top view of the charge density difference (CDD) plots of the studied  $\text{Ti}_3\text{C}_2$  (0001) MXene models. Yellowish regions denote electron depletion, *i.e.* the formation of positively charged regions, while blueish regions denote electron accumulation, and the formation of negatively charged regions. The contour intervals range to  $0.005 \text{ e} \cdot \text{\AA}^{-3}$  increments.

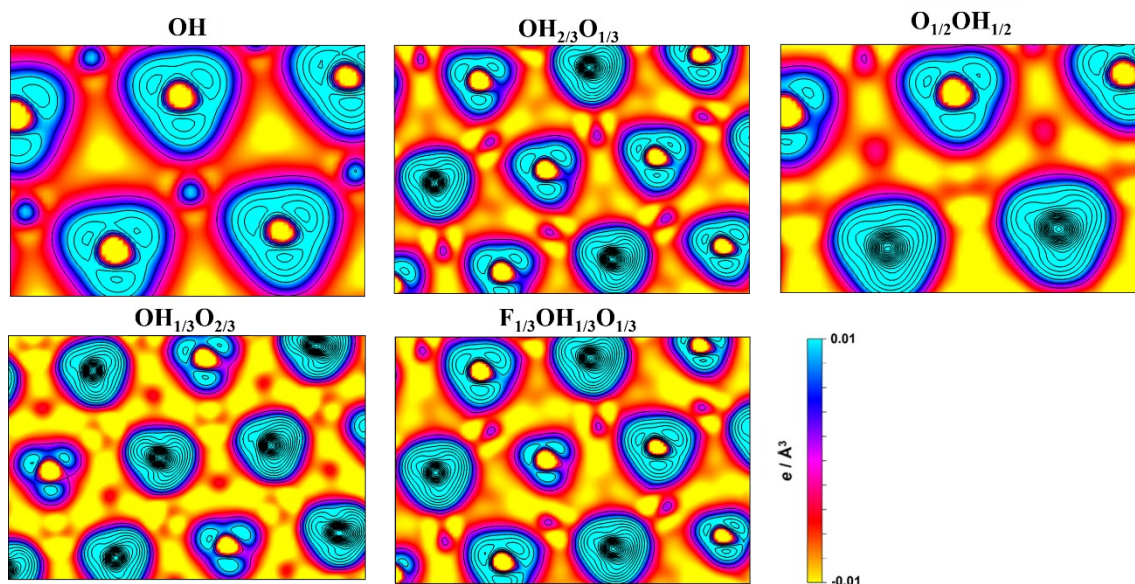

**Fig. S6** Calculated rates of adsorption,  $r_{\text{ads}}$ , and desorption,  $r_{\text{des}}$ , of  $\text{CO}_2$  and  $\text{CH}_4$  on (a) clean surface, (b) full  $-\text{OH}$ , (c)  $-\text{OH}_{2/3}\text{O}_{1/3}$ , (d)  $-\text{OH}_{1/2}\text{O}_{1/2}$ , (e)  $-\text{OH}_{1/3}\text{O}_{2/3}$ , (f)  $-\text{F}_{1/3}\text{OH}_{1/3}\text{O}_{1/3}$  terminations, as a function of temperature,  $T$ , and the gas partial pressure,  $p$ , here shown for 1 bar.

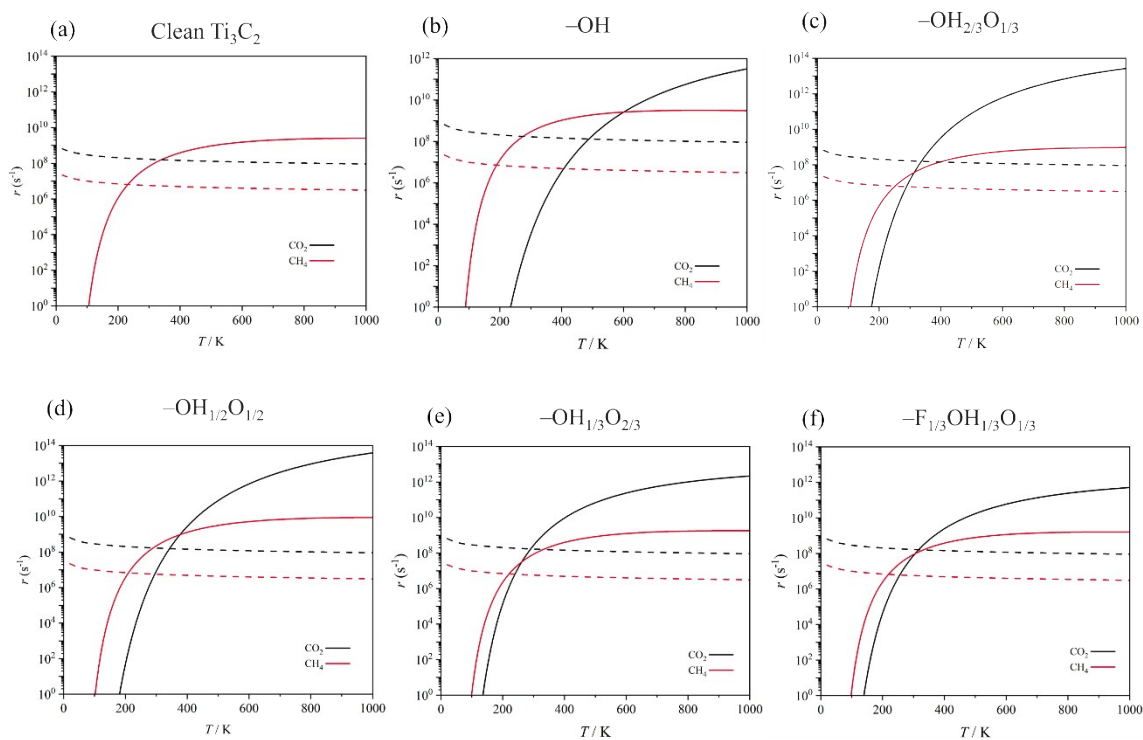

**Fig. S7** Complete Gibbs free energy,  $\Delta G$ , diagram of CO<sub>2</sub>RR on fully –OH terminated Ti<sub>3</sub>C<sub>2</sub> MXene, under standard working conditions. Blue lines represent chemical steps of as-generated H<sub>2</sub>O or CH<sub>4</sub> desorptions, or CO<sub>2</sub> adsorption, while black and grey lines represent the electrochemical proton-coupled electron transfer (PCET) steps at zero potential vs. SHE. The –nH\* symbols refer to how many H atoms have been transferred from surface –OH groups at the reaction stage.

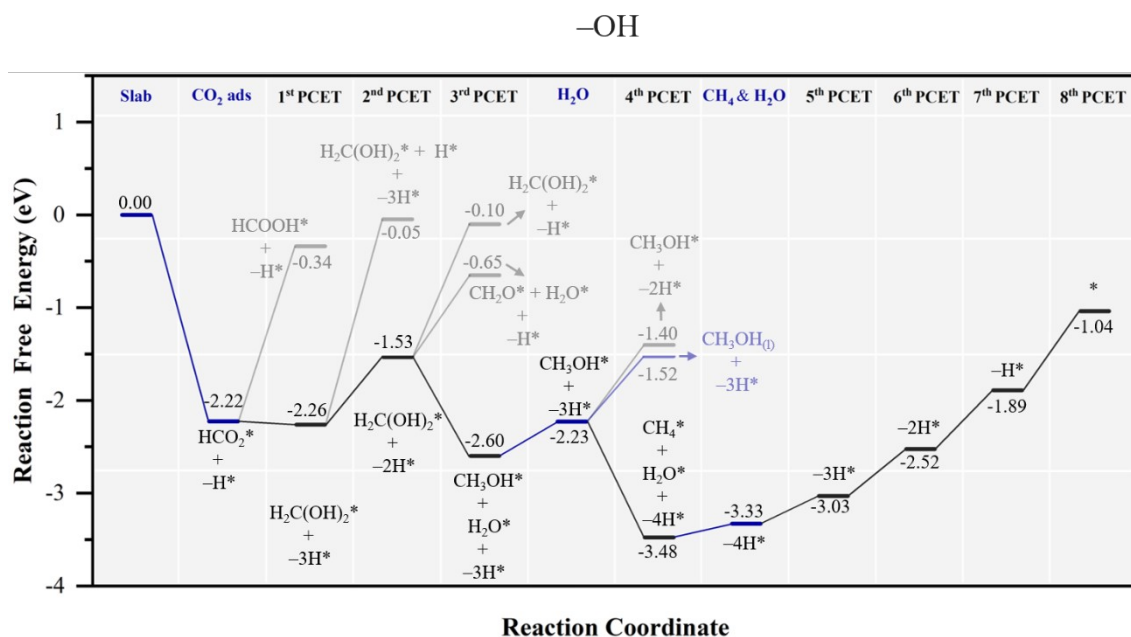



**Fig. S8** Complete Gibbs free energy,  $\Delta G$ , diagram of CO<sub>2</sub>RR on  $-\text{OH}_{2/3}\text{O}_{1/3}$  Ti<sub>3</sub>C<sub>2</sub> MXene model, under standard working conditions at zero potential vs. SHE. Colour code as in Figure S6. nH\* symbols refer to how many H atoms have been reduced over surface  $-\text{O}$  groups at the given reaction stage.

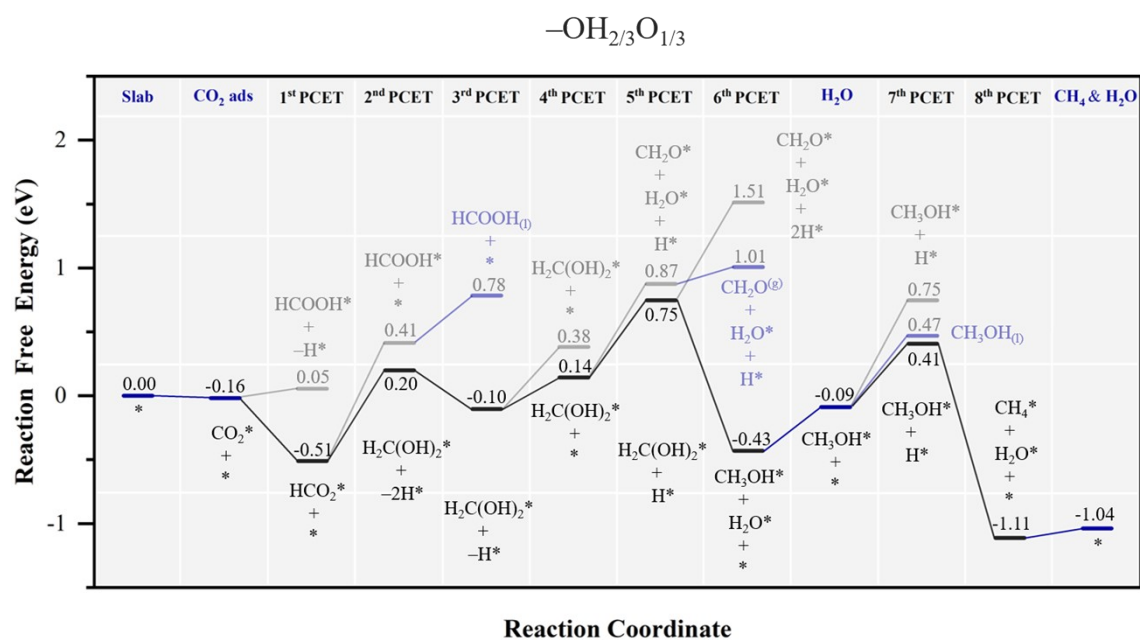

**Fig. S9** Complete Gibbs free energy,  $\Delta G$ , diagram of CO<sub>2</sub>RR on  $-\text{OH}_{1/2}\text{O}_{1/2}$  Ti<sub>3</sub>C<sub>2</sub> MXene model, under standard working conditions at zero potential vs. SHE. Colour code and notation as in Figures S6 and S7.

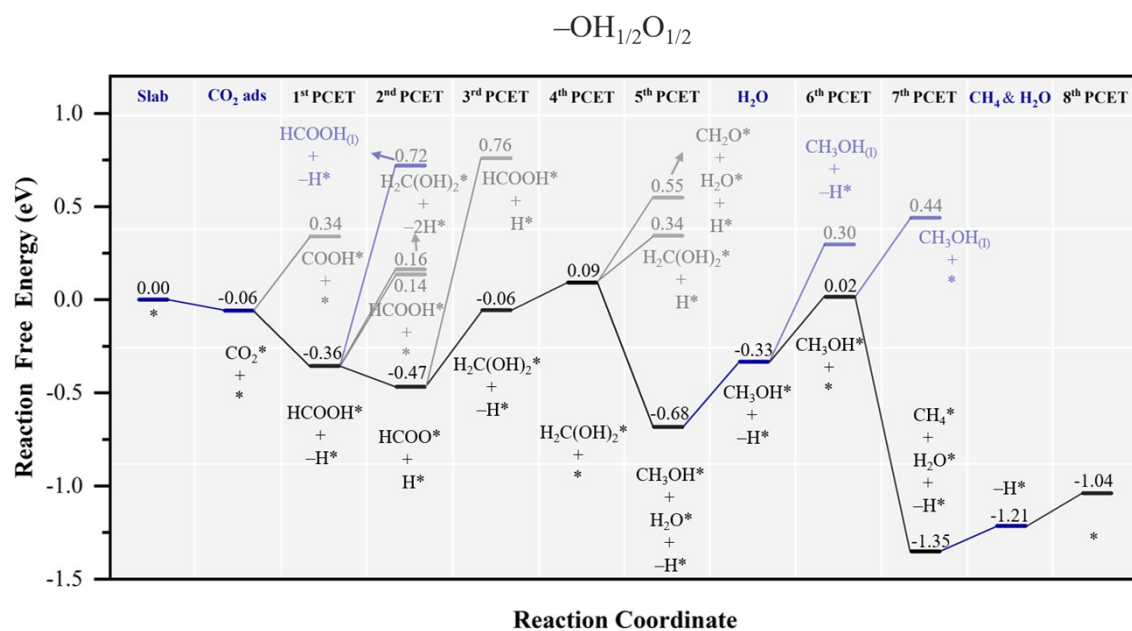

**Fig. S10** Complete Gibbs free energy,  $\Delta G$ , diagram of CO<sub>2</sub>RR on  $-\text{OH}_{1/3}\text{O}_{2/3}$  Ti<sub>3</sub>C<sub>2</sub> MXene model, under standard working conditions at zero potential vs. SHE. Colour code and notation as in Figures S6 and S7.

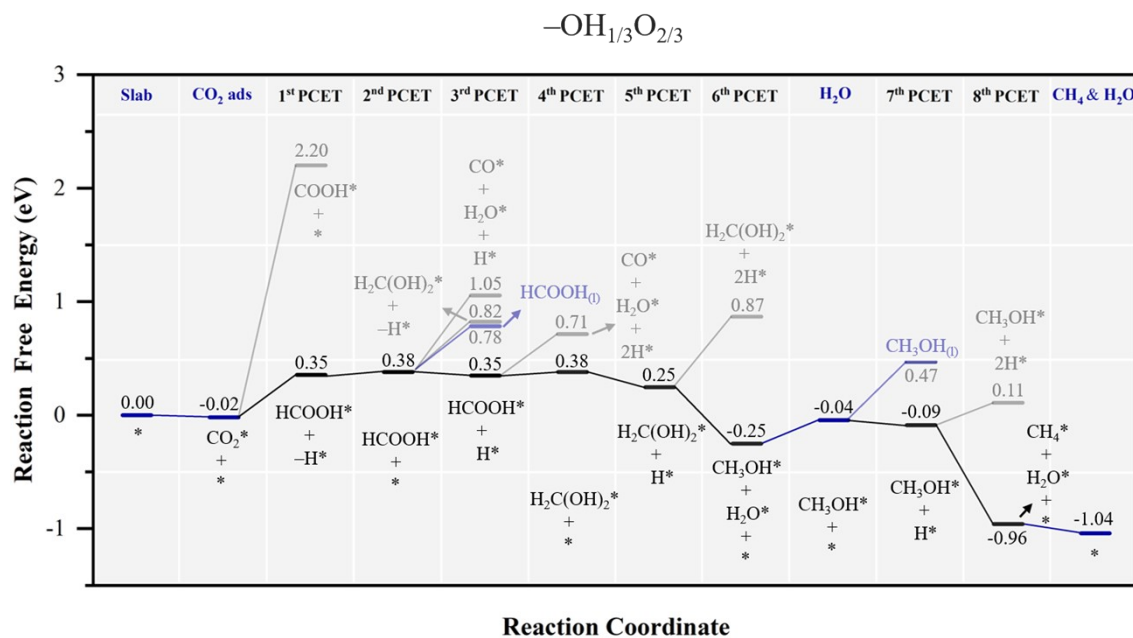

**Fig. S11** Complete Gibbs free energy,  $\Delta G$ , diagram of CO<sub>2</sub>RR on  $-F_{1/3}OH_{1/3}O_{1/3}$  Ti<sub>3</sub>C<sub>2</sub> MXene model, under standard working conditions at zero potential vs. SHE. Colour code and notation as in Figures S6 and S7.

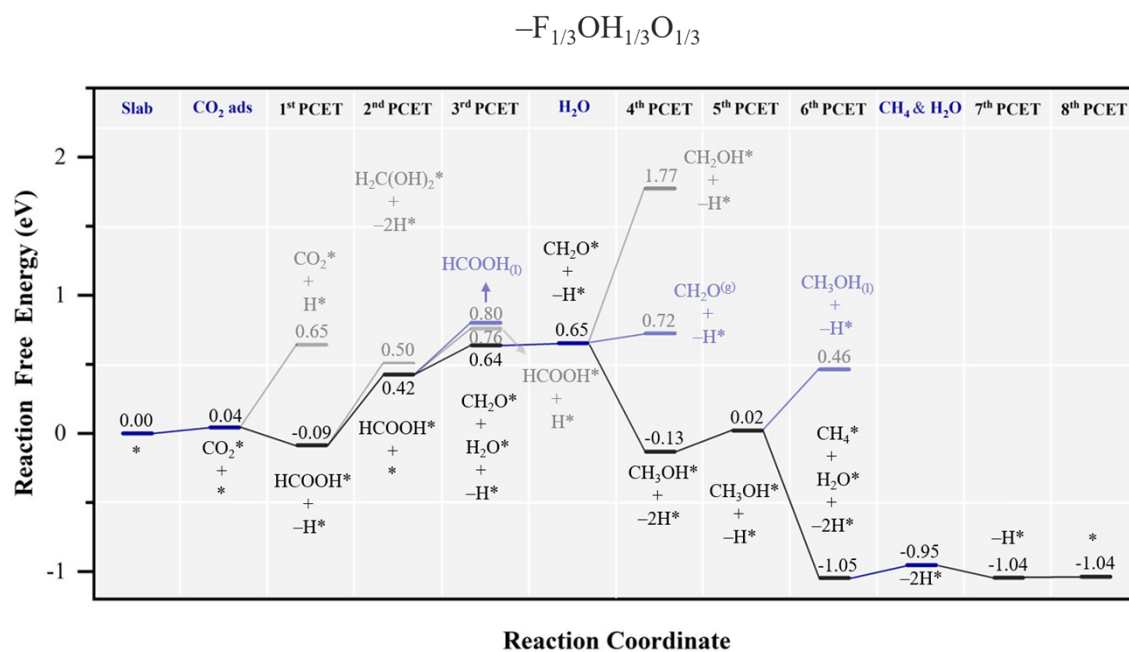

Supplement: d4ta00320a1.pdf [file d4ta00320a1.pdf]
